# Supplementary material for: Polyelectrolyte Complex Based Interfacial Drug Delivery System with Controlled Loading and Improved Release Performance for Bone Therapeutics
Source: Nanomaterials (Basel). 2016 Mar 22;6(3):53. doi: 10.3390/nano6030053 (PMC5302517; doi:10.3390/nano6030053)

# Supplementary Materials: Polyelectrolyte Complex Based Interfacial Drug Delivery System with Controlled Loading and Improved Release Performance for Bone Therapeutics

David Vehlow, Romy Schmidt, Annett Gebert, Maximilian Siebert, Katrin Susanne Lips and Martin Müller

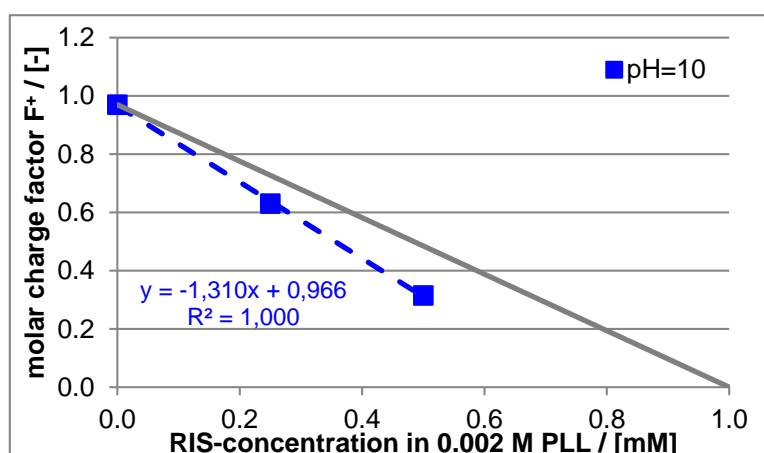

**Figure S1.** Molar charge factor of PLL at pH = 10 in dependence of RIS concentration in solution.

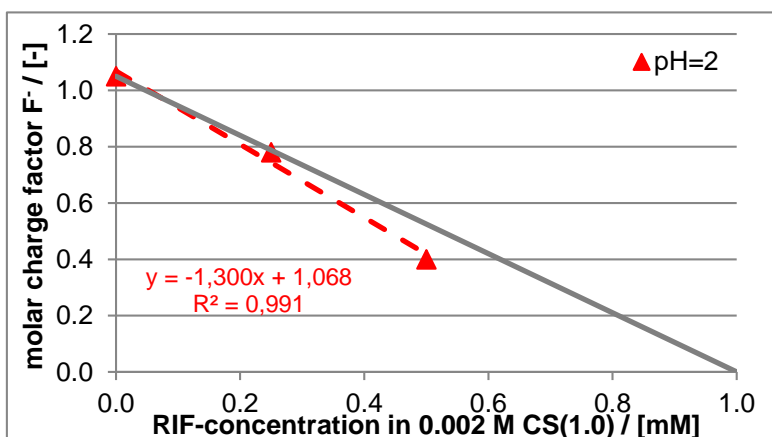

**Figure S2.** Molar charge units of CS-1.0 at pH = 2 in dependence of RIF concentration in solution.

**Table S1.** Assignments of diagnostic peaks in Fourier transform infrared (FTIR) spectra of drug loaded polyelectrolyte complex (PEC) coatings. IR: Infrared; RIF: Rifampicin; PLL: Poly(L-lysine); CS: Cellulose sulfates; RIS: Risedronate.

| Peak (cm <sup>-1</sup> ) | IR Vibration | Component |
|--------------------------|--------------|-----------|
| 1725                     | v(C=O)       | RIF       |
| 1650                     | Amide I      | PLL       |
| 1220                     | v(O=S=O)     | CS        |
| 1093                     | v(O=P=O)     | RIS       |

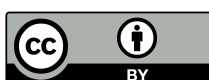

Supplement: Supplementary file 1 [file nanomaterials-06-00053-s001.pdf]
